# Supplementary material for: Gain-of-Function Mutations in the KATP Channel (KCNJ11) Impair Coordinated Hand-Eye Tracking
Source: PubMed Central journal article supplement (PMC3633835; doi:10.1371/journal.pone.0062646), 2013-04-23
Supplement: pone.0062646.s001.pdf [file pone.0062646.s001.pdf]

**TABLE S1**

| <b>Pair</b> | <b>Group</b> | <b>Mutation</b> | <b>Age (years)</b> | <b>Sex</b> |
|-------------|--------------|-----------------|--------------------|------------|
| 1           | Control      | wt              | 9                  | F          |
|             | PNDM         | R201H           | 9                  | F          |
| 2           | Control      | wt              | 10                 | M          |
|             | PNDM         | R201H           | 9                  | M          |
| 3           | Control      | wt              | 7                  | F          |
|             | PNDM         | R201H           | 7                  | F          |
| 4           | Control      | wt              | 28                 | M          |
|             | PNDM         | R201H           | 29                 | M          |
| 5           | Control      | wt              | 24                 | M          |
|             | PNDM         | R201H           | 18                 | M          |
| 6           | Control      | wt              | 25                 | F          |
|             | PNDM         | R201H           | 20                 | F          |
| 7           | Control      | wt              | 6                  | M          |
|             | PNDM         | E322K           | 7                  | M          |
| Pooled      | Control      |                 | Mean = 16          | 4M, 3F     |
|             | PNDM         |                 | Mean = 14          | 4M, 3F     |
