# Supplementary material for: Gain-of-Function Mutations in the KATP Channel (KCNJ11) Impair Coordinated Hand-Eye Tracking
Source: PubMed Central journal article supplement (PMC3633835; doi:10.1371/journal.pone.0062646), 2013-04-23
Supplement: pone.0062646.s002.pdf [file pone.0062646.s002.pdf]

**TABLE S2**

| <b>Pair</b>                                      | <b>Group</b> | <b>Mutation</b> | <b>Age (years)</b> | <b>Sex</b> |
|--------------------------------------------------|--------------|-----------------|--------------------|------------|
| 1                                                | Control      | wt              | 25                 | F          |
|                                                  | iDEND        | V59M            | 13                 | F          |
| 2                                                | Control      | wt              | 27                 | F          |
|                                                  | iDEND        | V59M            | 20                 | F          |
| 3                                                | Control      | wt              | 15                 | M          |
|                                                  | iDEND        | V59M            | 17                 | F          |
| 4 *                                              | Control      | wt              | 8                  | F          |
|                                                  | iDEND        | V59M            | 9                  | M          |
| 5                                                | Control      | wt              | 10                 | M          |
|                                                  | iDEND        | R201C           | 9                  | F          |
| 6                                                | Control      | wt              | 30                 | F          |
|                                                  | iDEND        | R201C           | 33                 | F          |
| 7                                                | Control      | wt              | 35                 | F          |
|                                                  | iDEND        | R201S           | 36                 | M          |
| Pooled                                           | Control      |                 | Mean = 21          | 2M, 5F     |
|                                                  | iDEND        |                 | Mean = 20          | 2M, 5F     |
| * Patient with iDEND only completed tasks 1 & 2. |              |                 |                    |            |
